# Supplementary material for: Bidirectional Modulation of the Voltage-Gated Sodium (Nav1.6) Channel by Rationally Designed Peptidomimetics
Source: PubMed Central journal article supplement (PMC7435778; doi:10.3390/molecules25153365), 2020-07-24

## *Supporting Information*

### **Bidirectional Modulation of the Voltage Gated Sodium (Nav1.6) Channel by Rationally Designed Peptidomimetics**

Nolan M. Dvorak,<sup>a,1</sup> Paul A. Wadsworth,<sup>a,1</sup> Pingyuan Wang,<sup>a,1</sup> Haiying Chen,<sup>a</sup> Jia Zhou,<sup>a,b,\*\*</sup> and  
Fernanda Laezza<sup>a,b,\*</sup>

<sup>a</sup>Chemical Biology Program, Department of Pharmacology and Toxicology, University of Texas  
Medical Branch, Galveston, Texas 77555, United States

<sup>b</sup>Center for Addiction Research, The University of Texas Medical Branch, Galveston, Texas  
77555, United States

<sup>1</sup>These authors contributed equally to this work.

#### **Corresponding authors:**

\*Fernanda Laezza, MD, PhD  
Department of Pharmacology and Toxicology  
Center for Addiction Research  
University of Texas Medical Branch  
Galveston, Texas 77555, United States  
Email: [felaezza@utmb.edu](mailto:felaezza@utmb.edu)

\*\*Jia Zhou, PhD  
Department of Pharmacology and Toxicology  
Chemical Biology Program  
University of Texas Medical Branch  
Galveston, Texas 77555, United States  
Email: [jizhou@utmb.edu](mailto:jizhou@utmb.edu)

## Table of Contents

Copies of  $^1\text{H}$  and  $^{13}\text{C}$  NMR spectra

S3-14

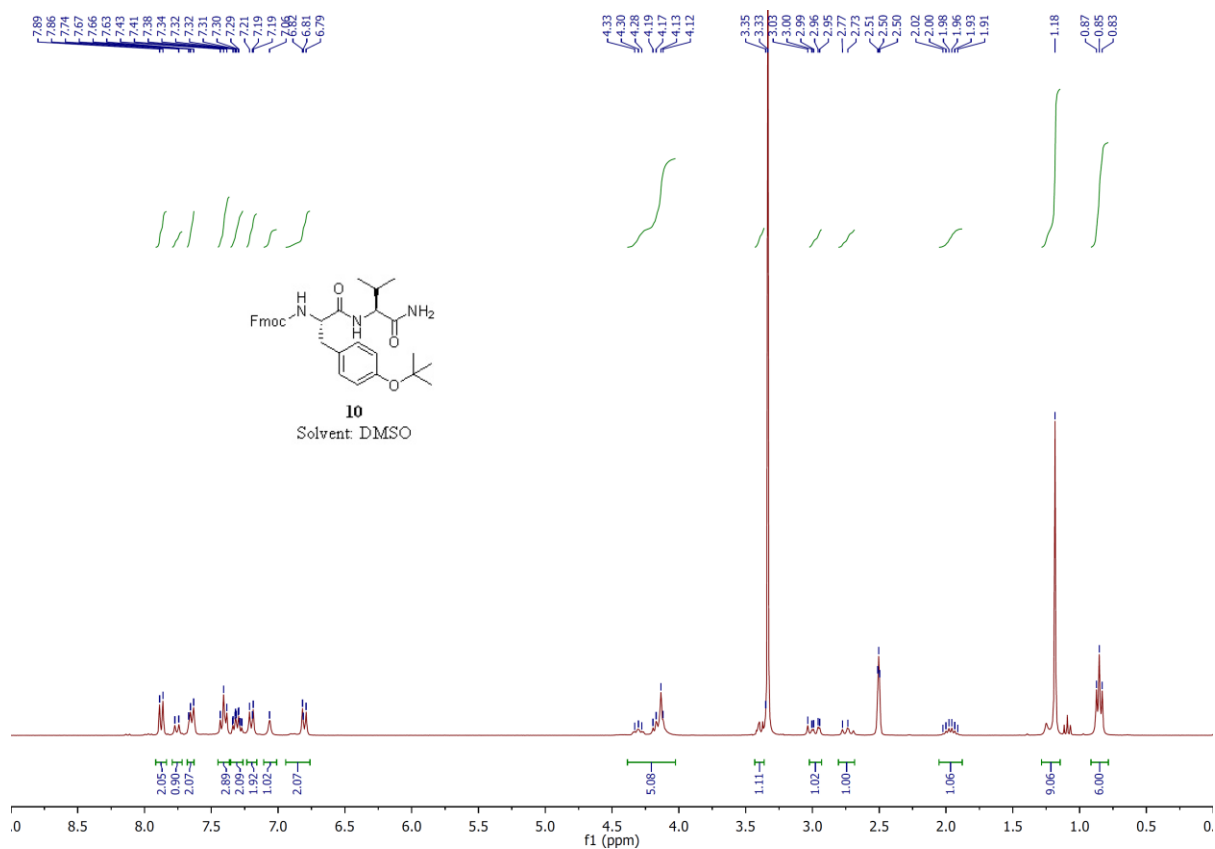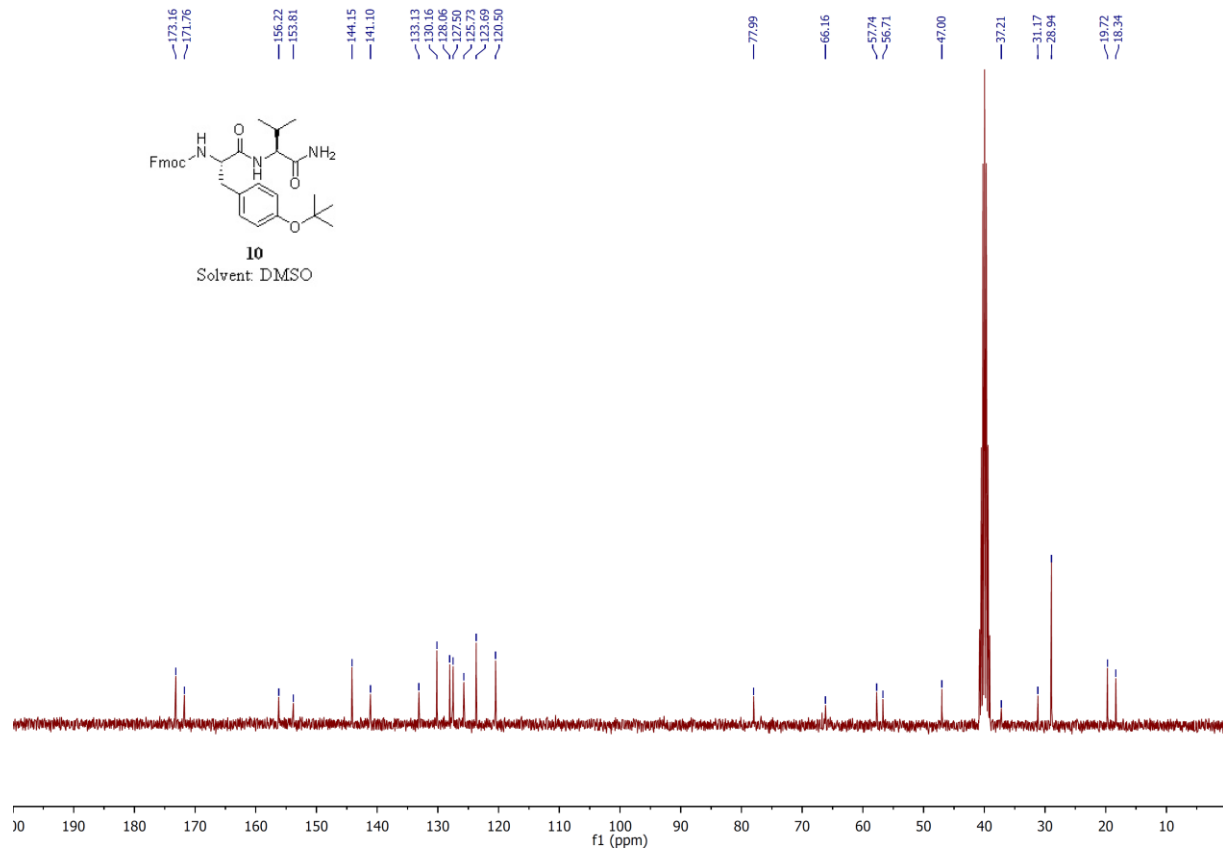

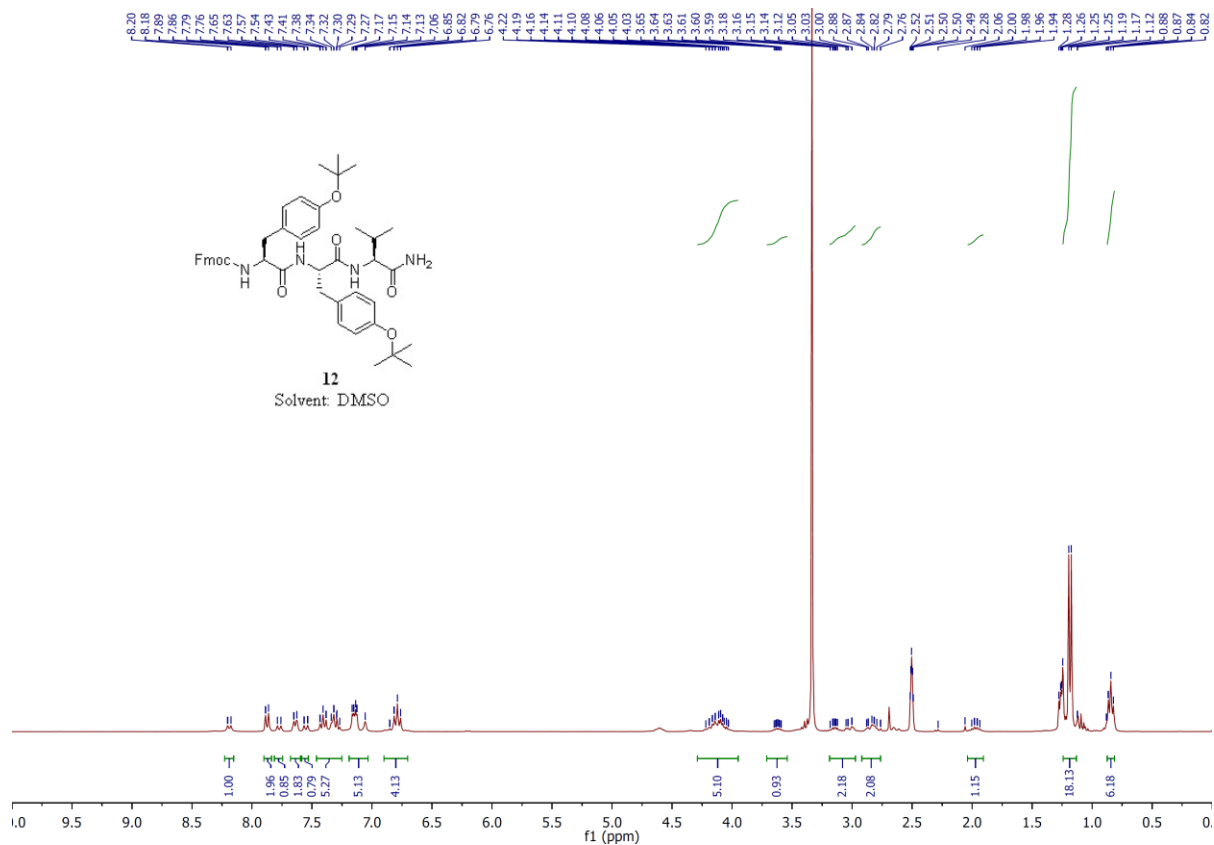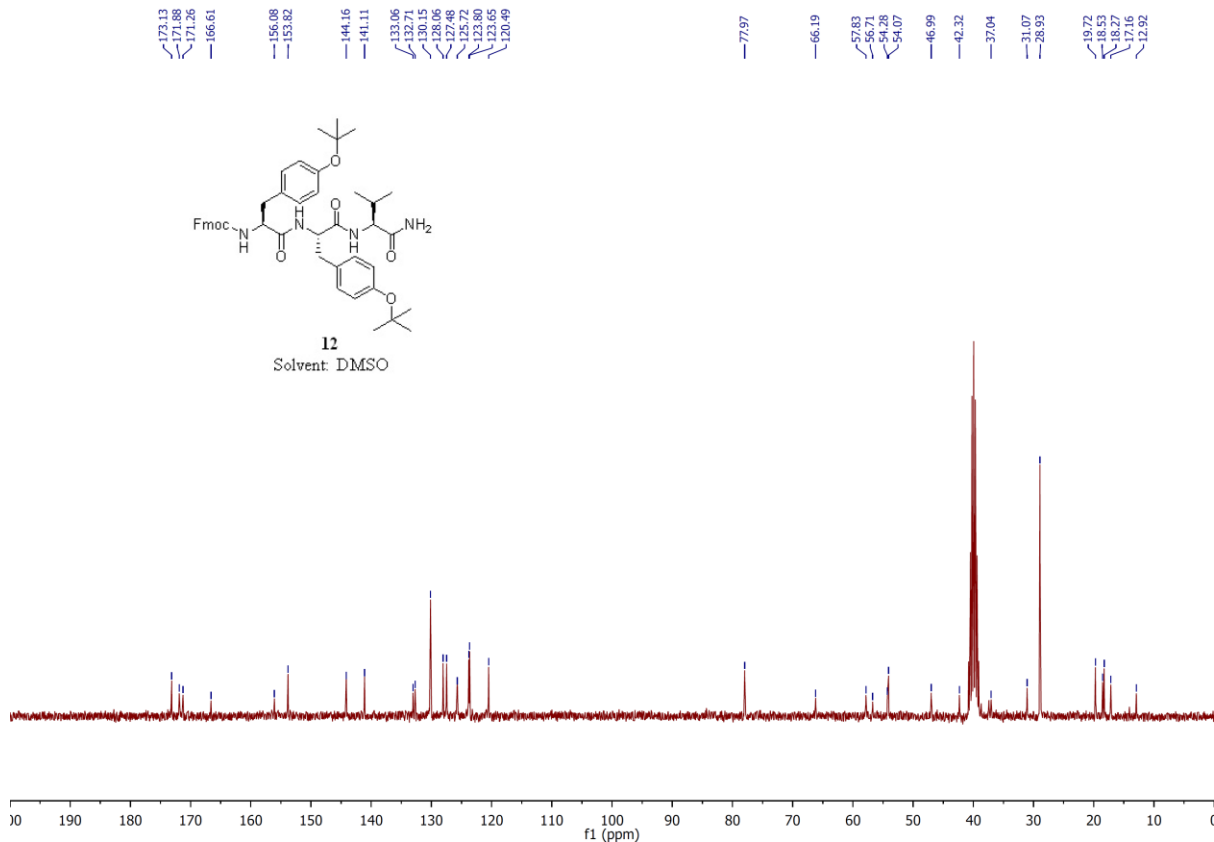

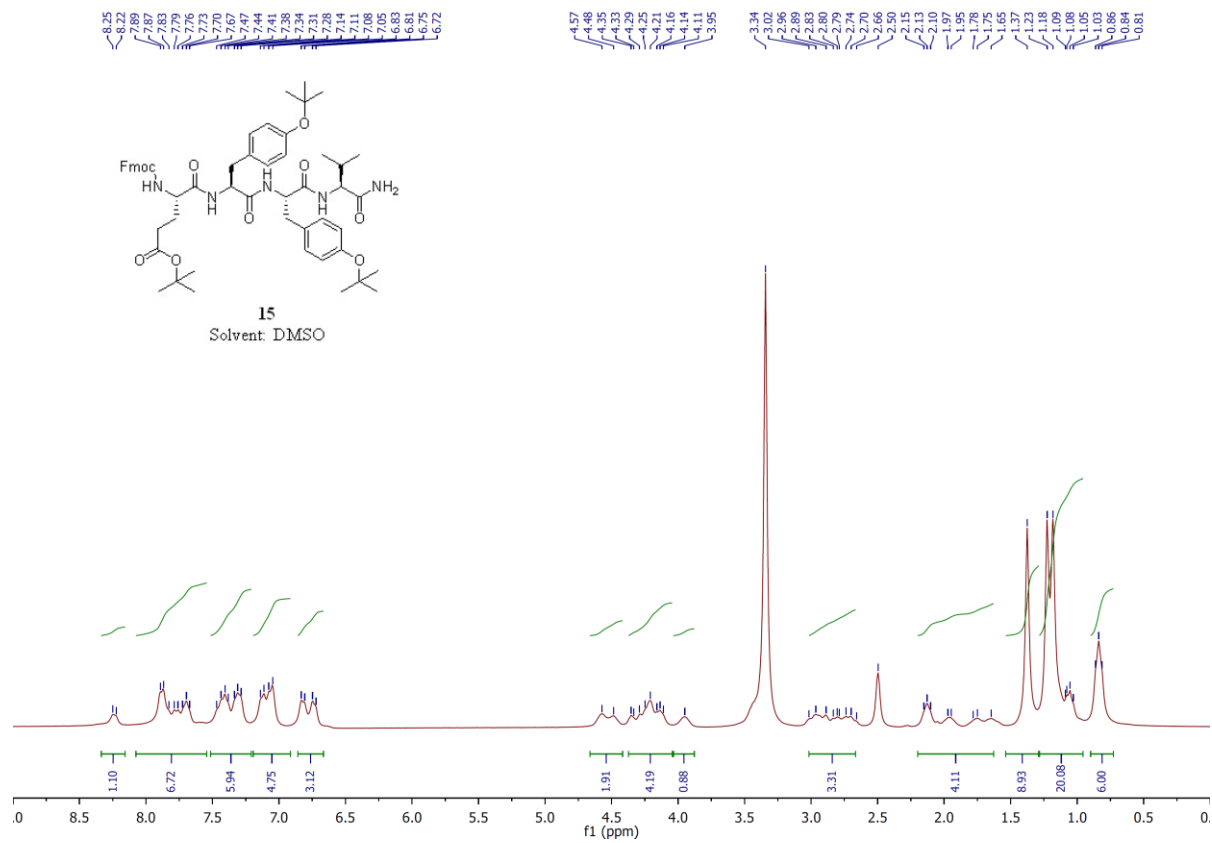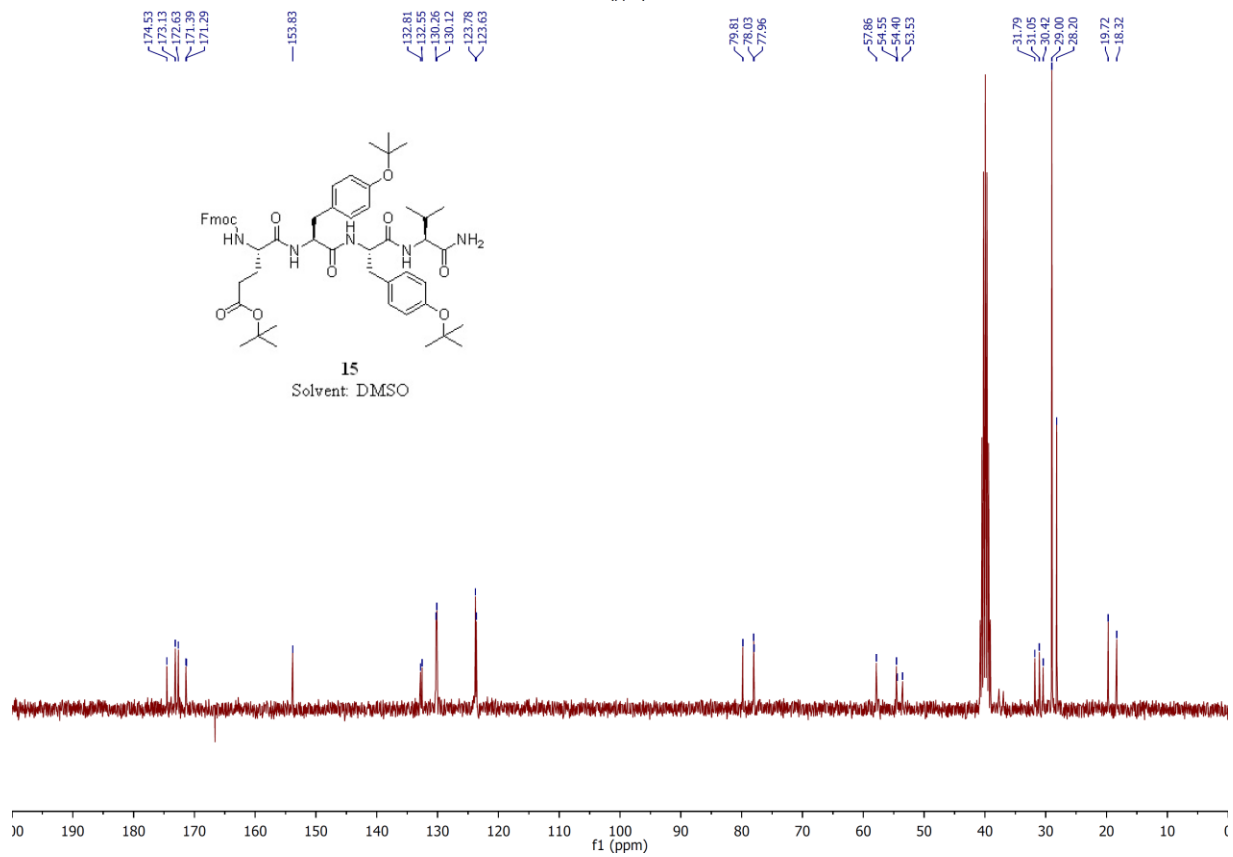

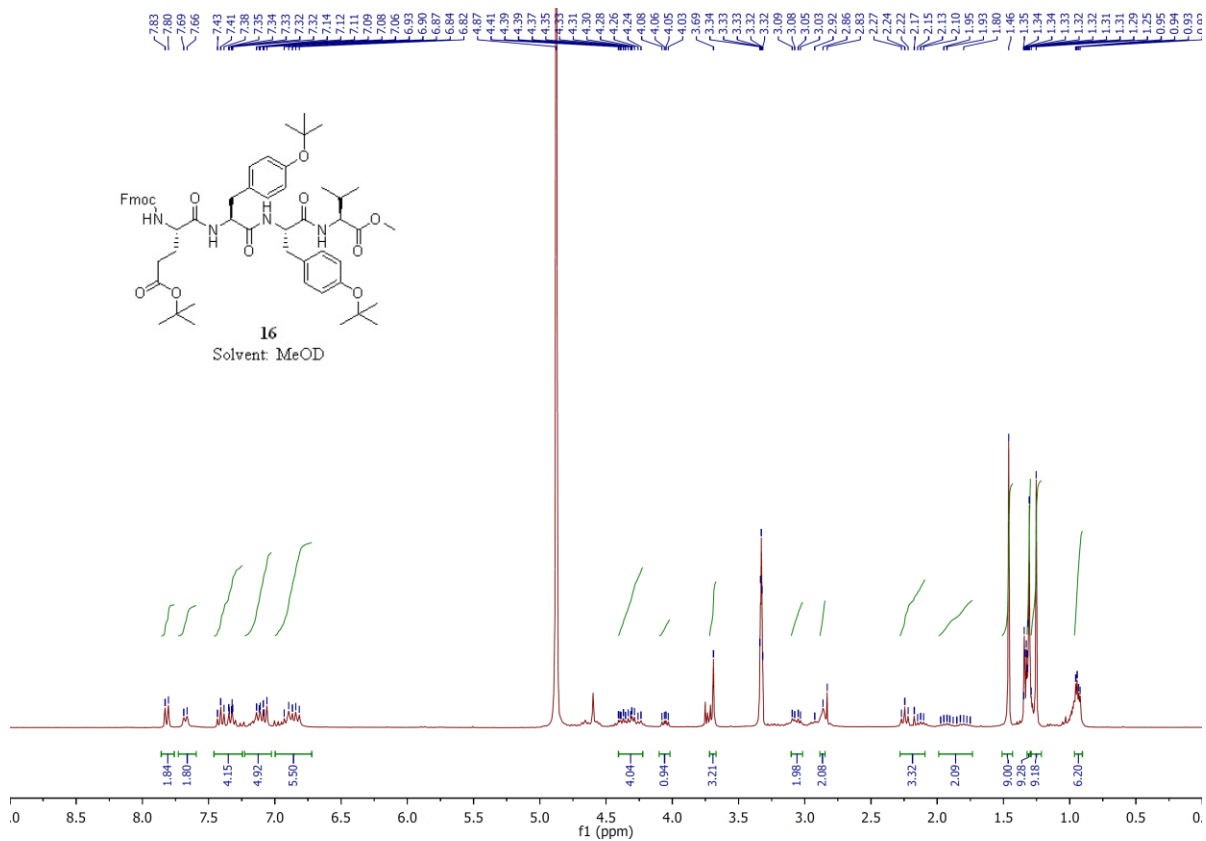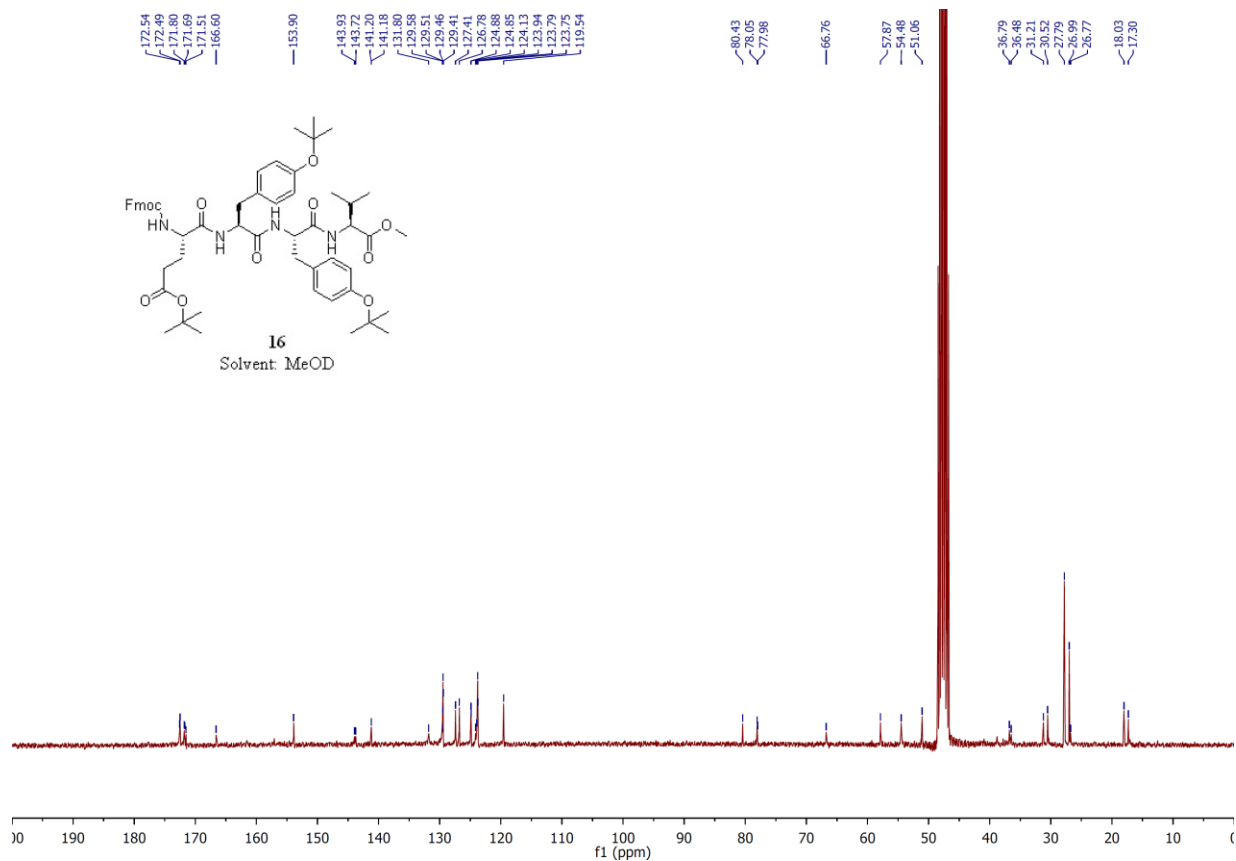

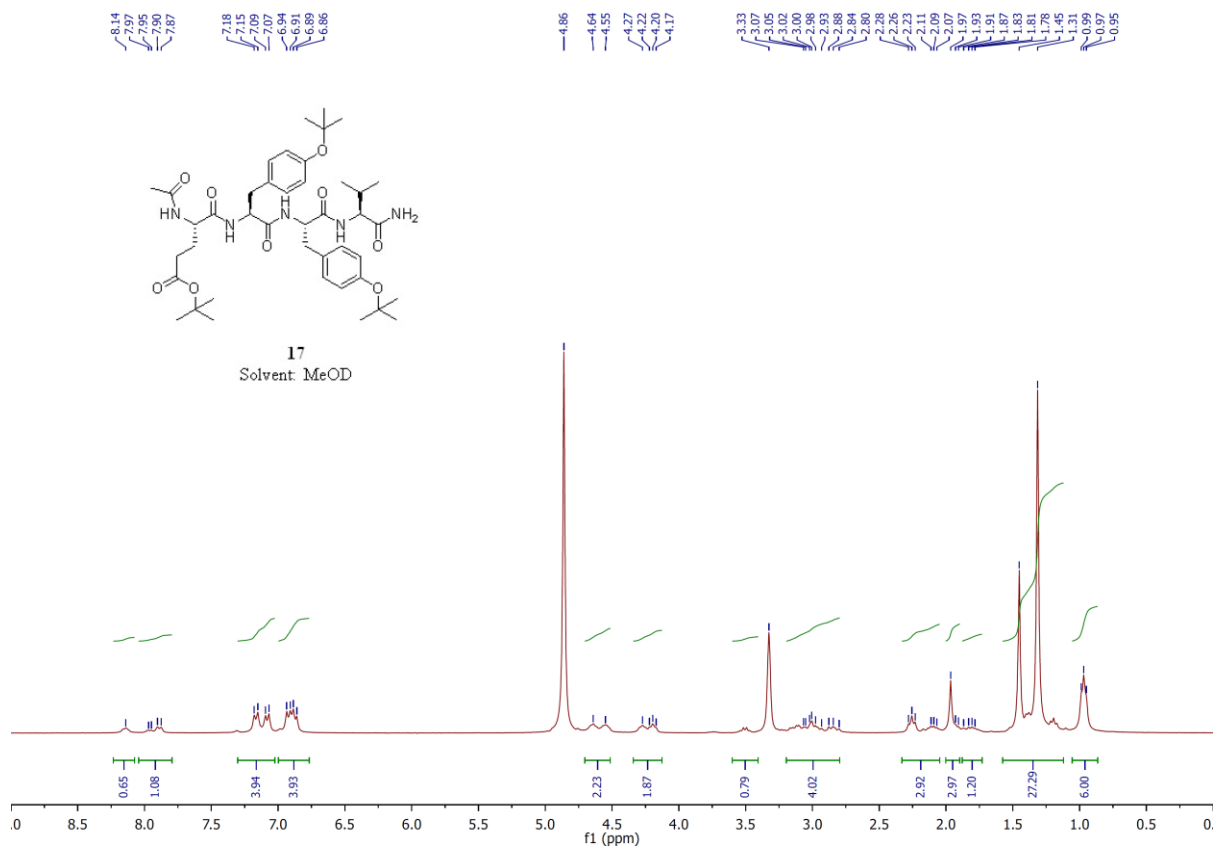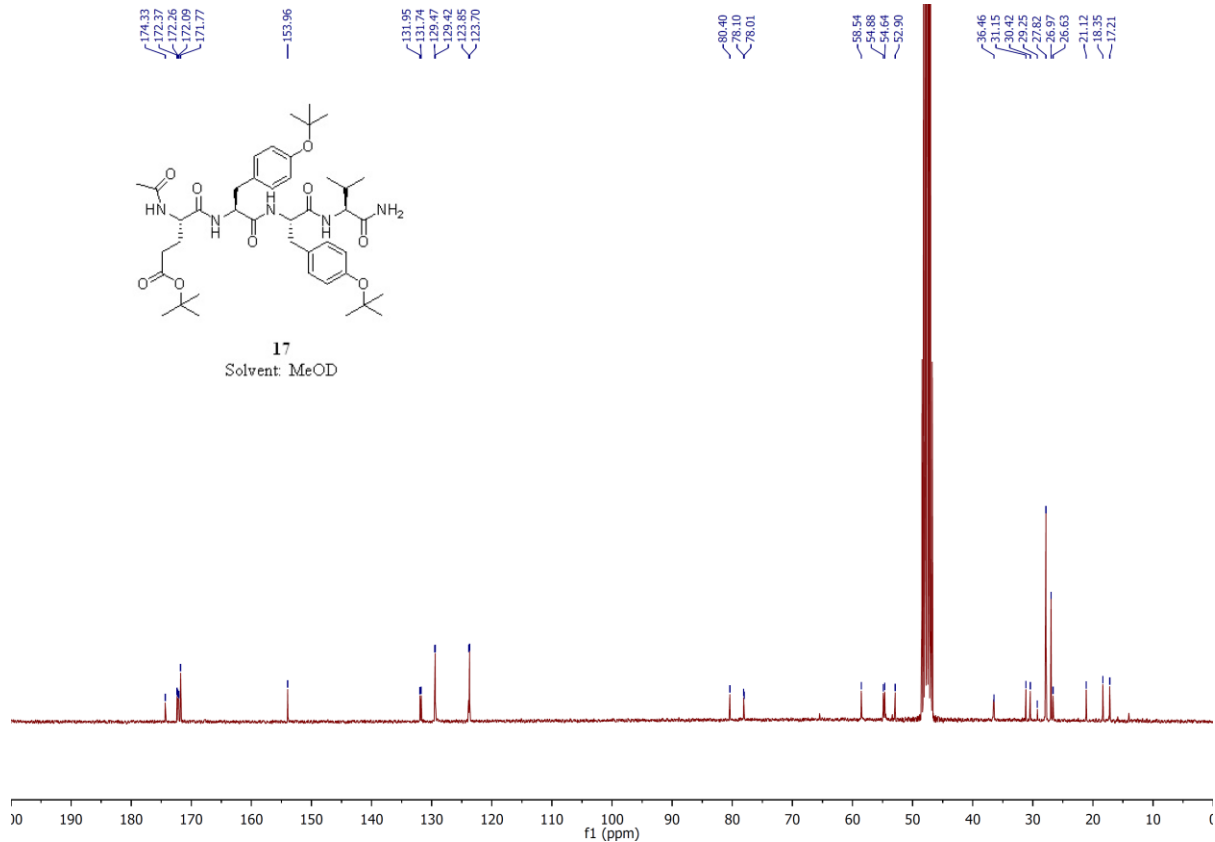

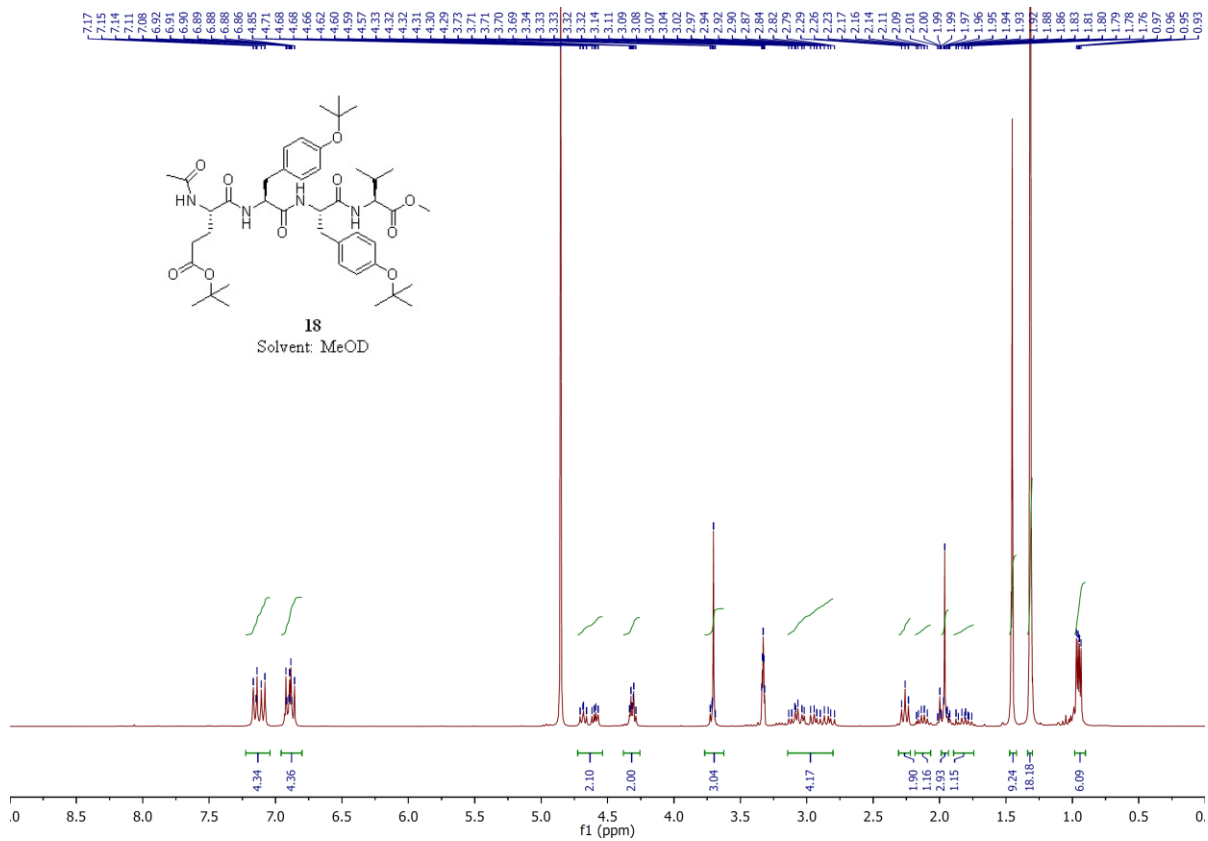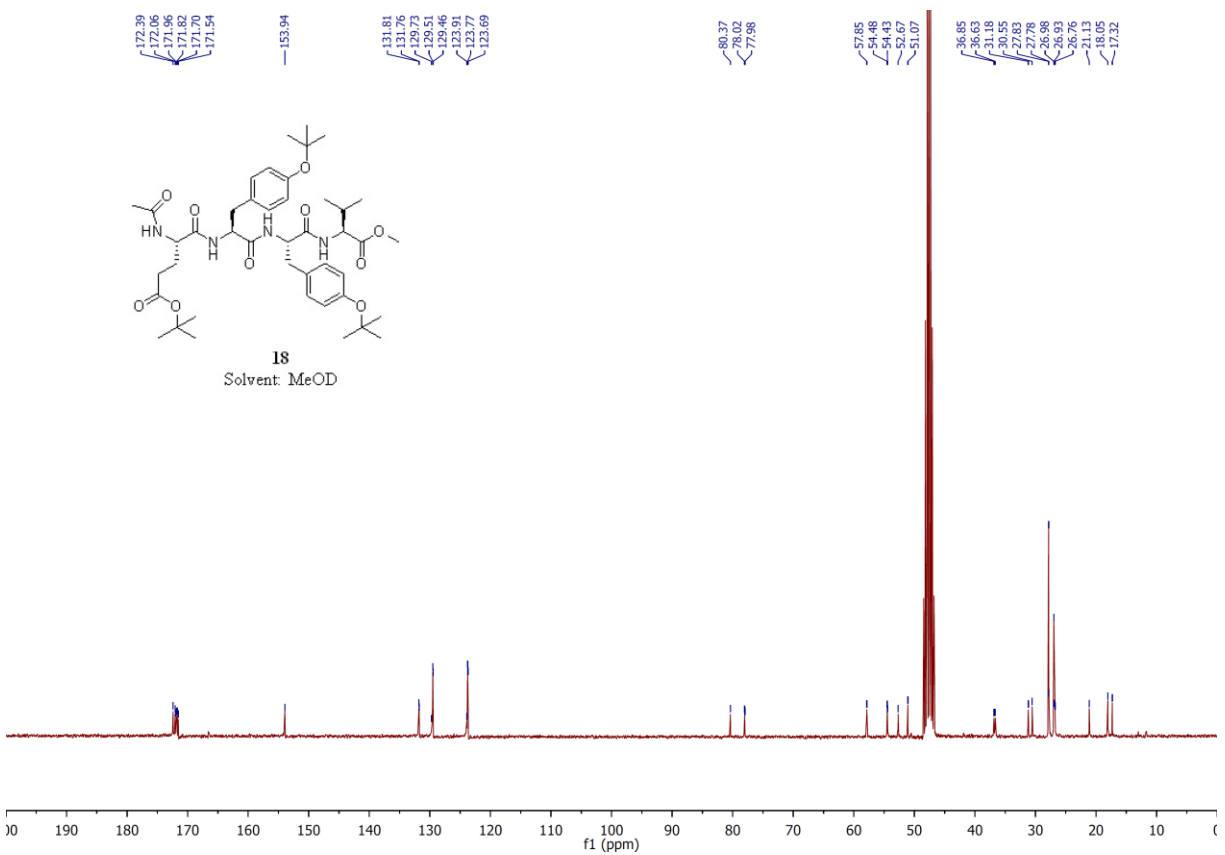



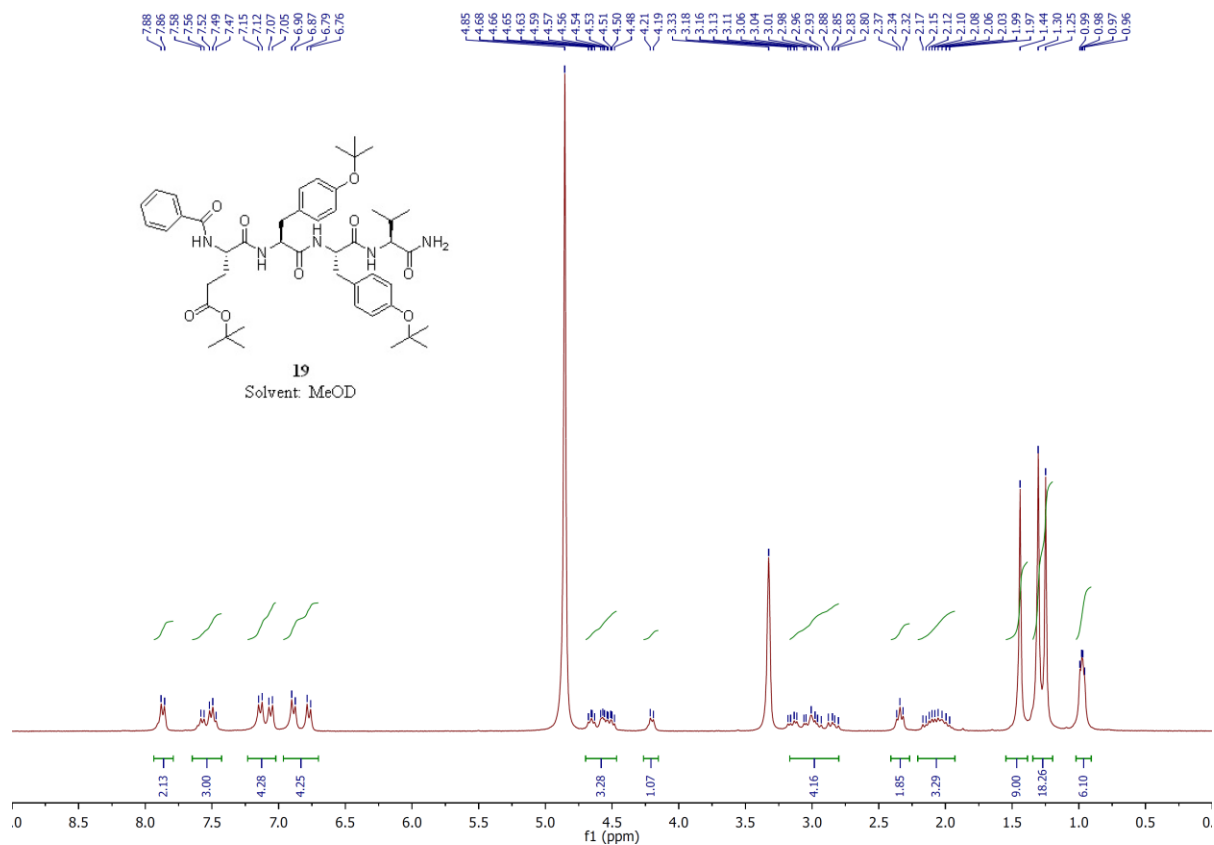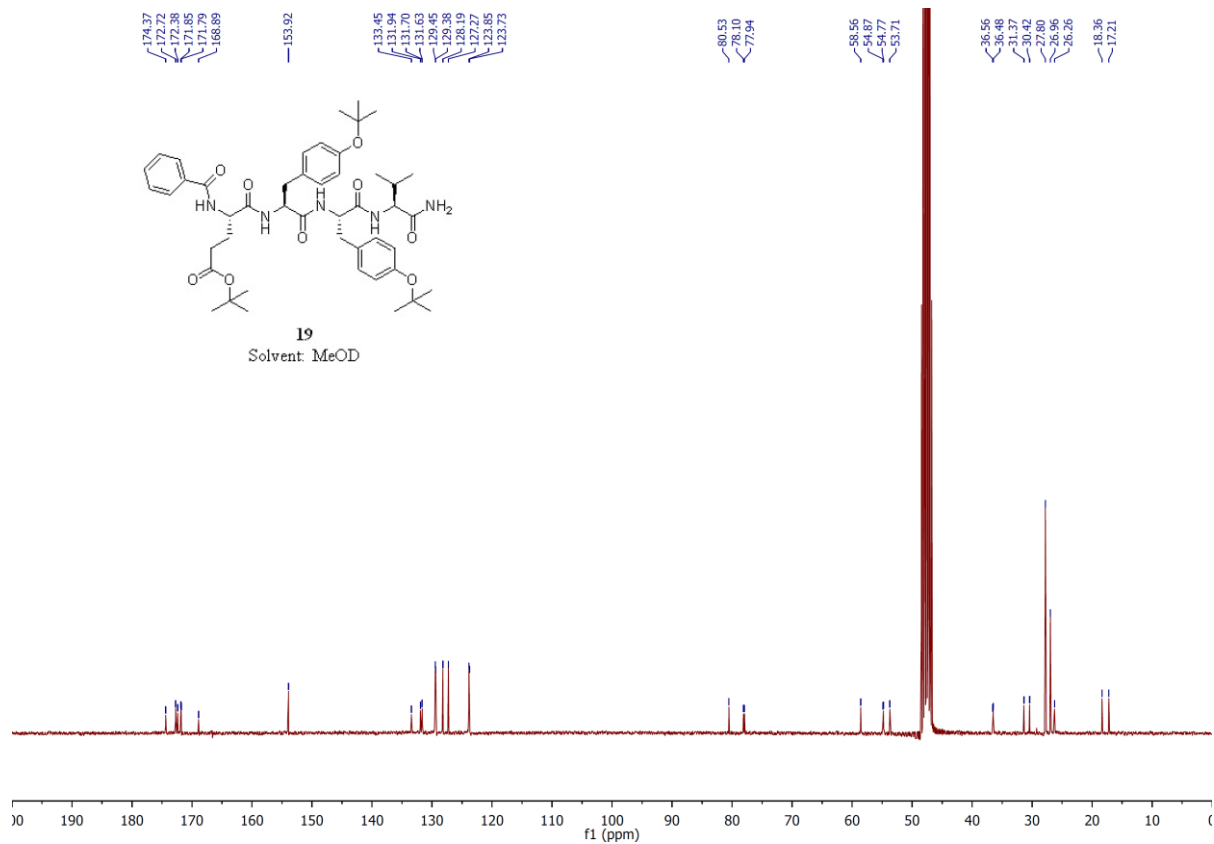

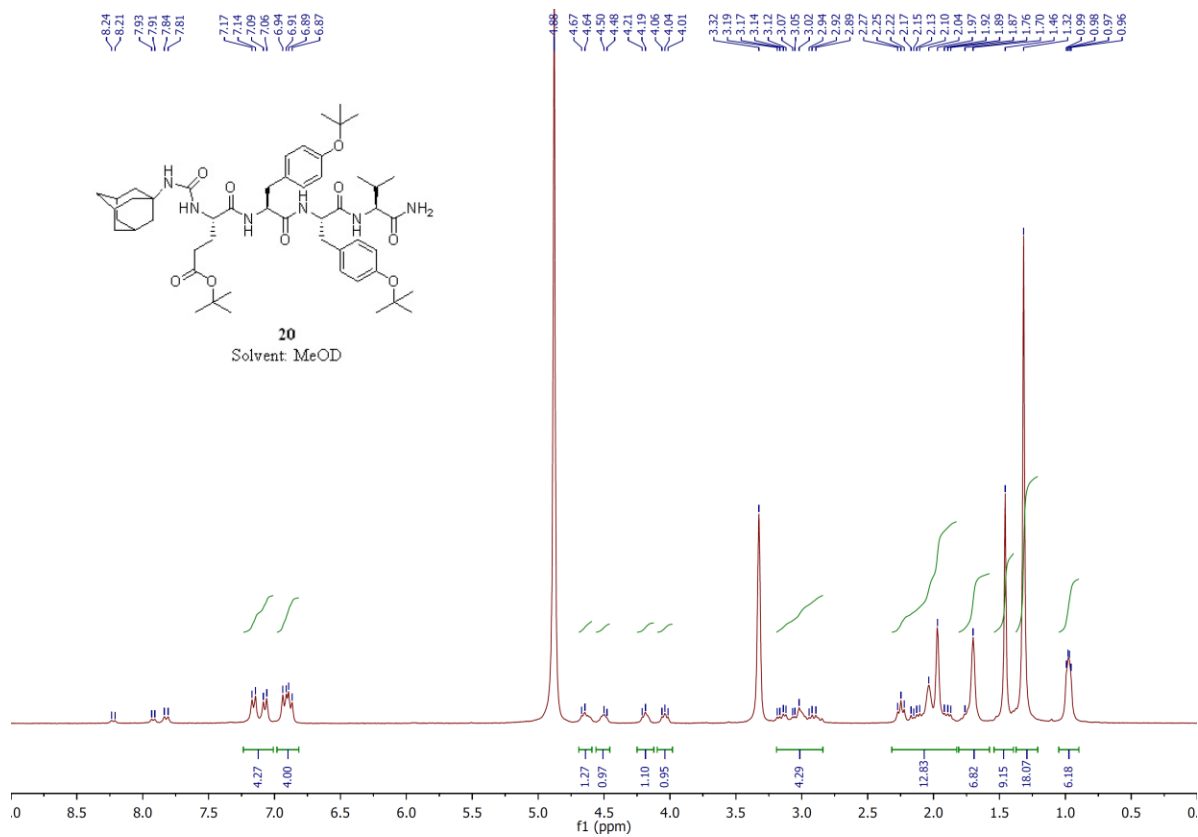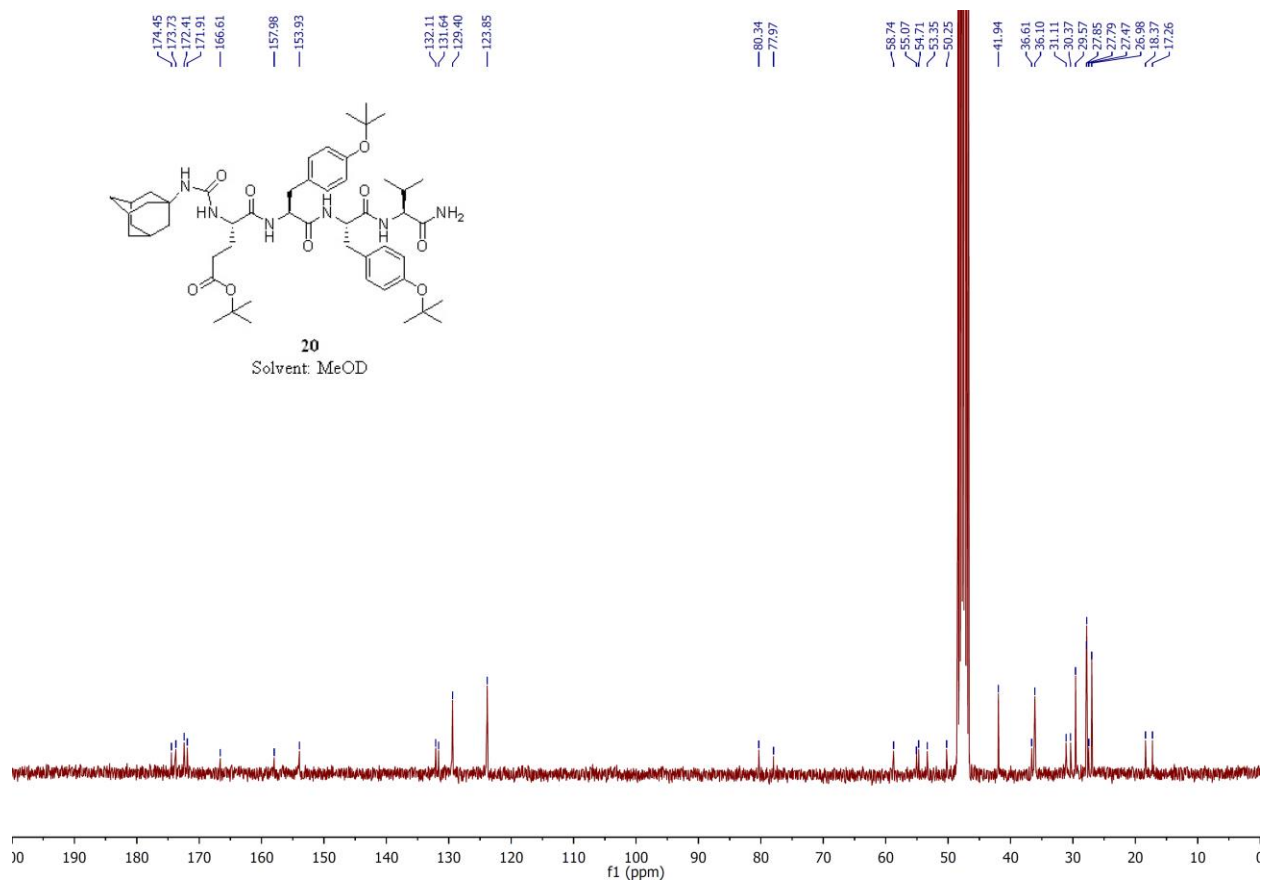

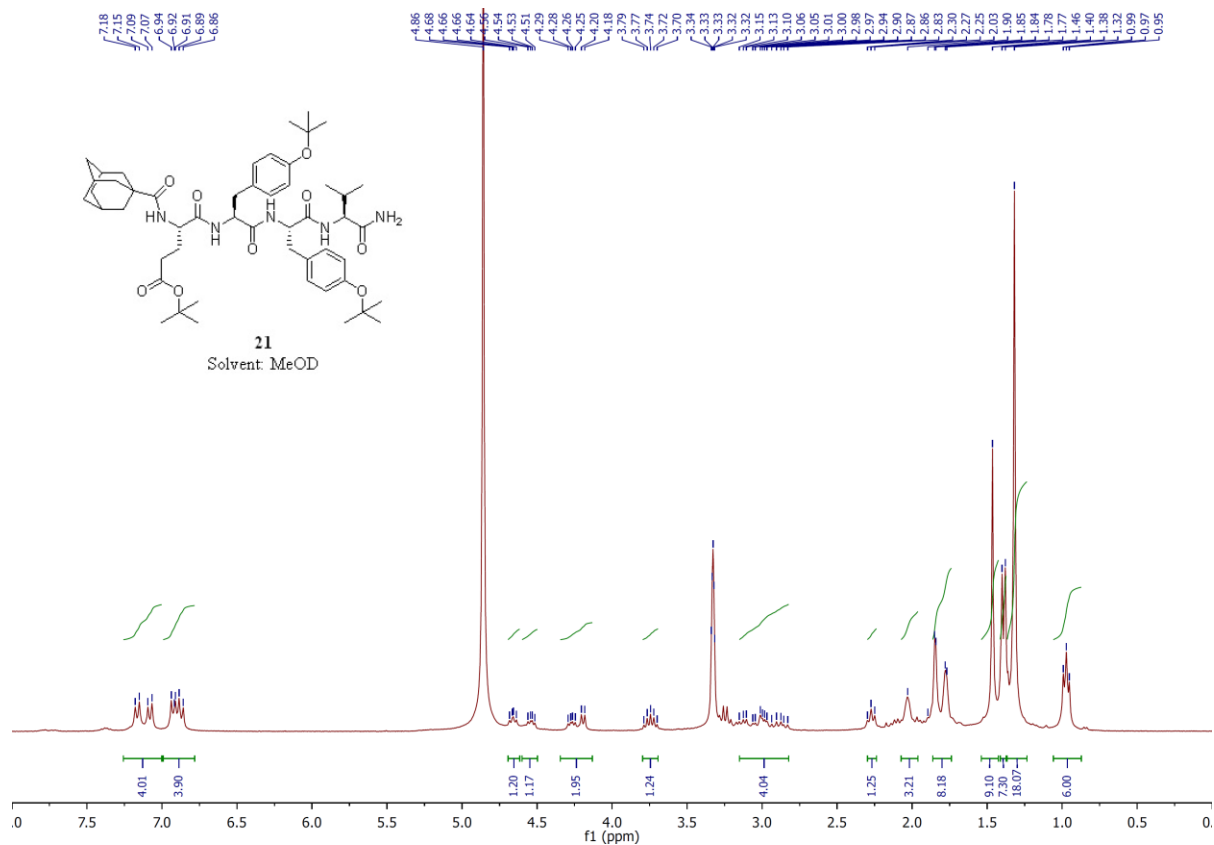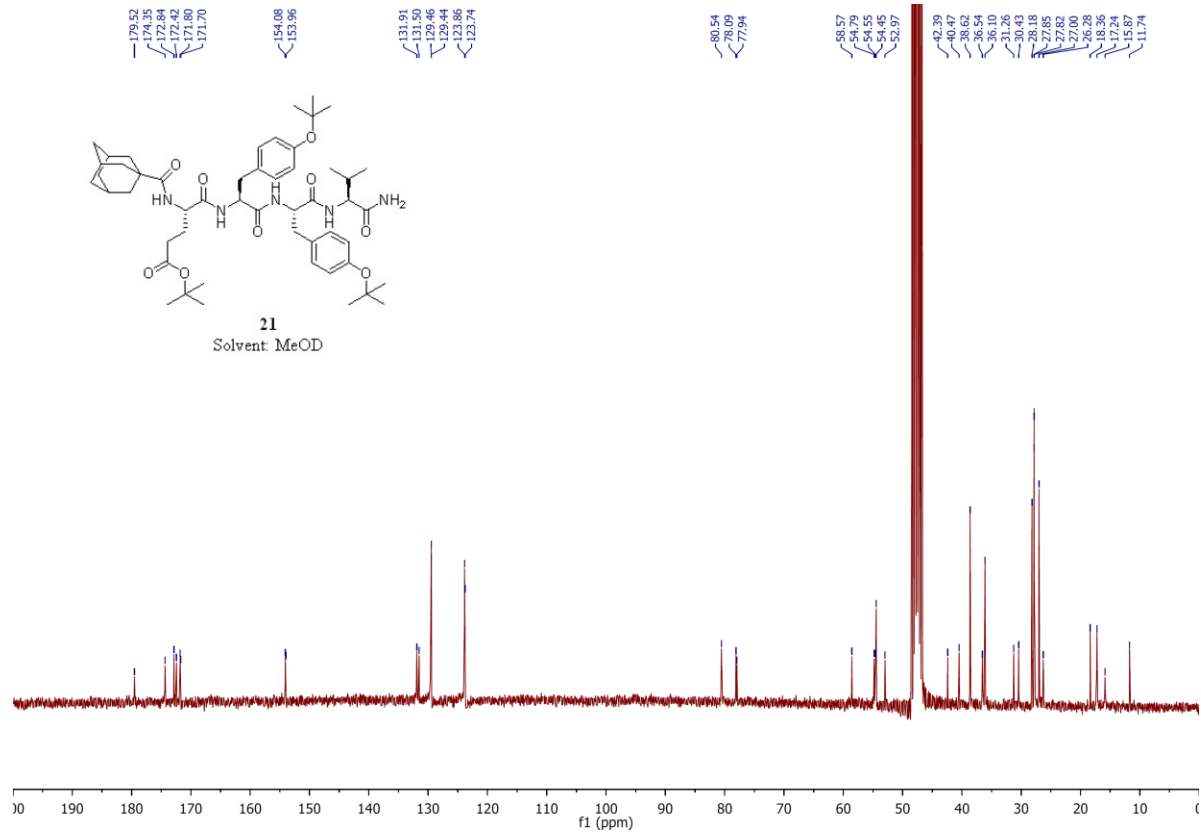

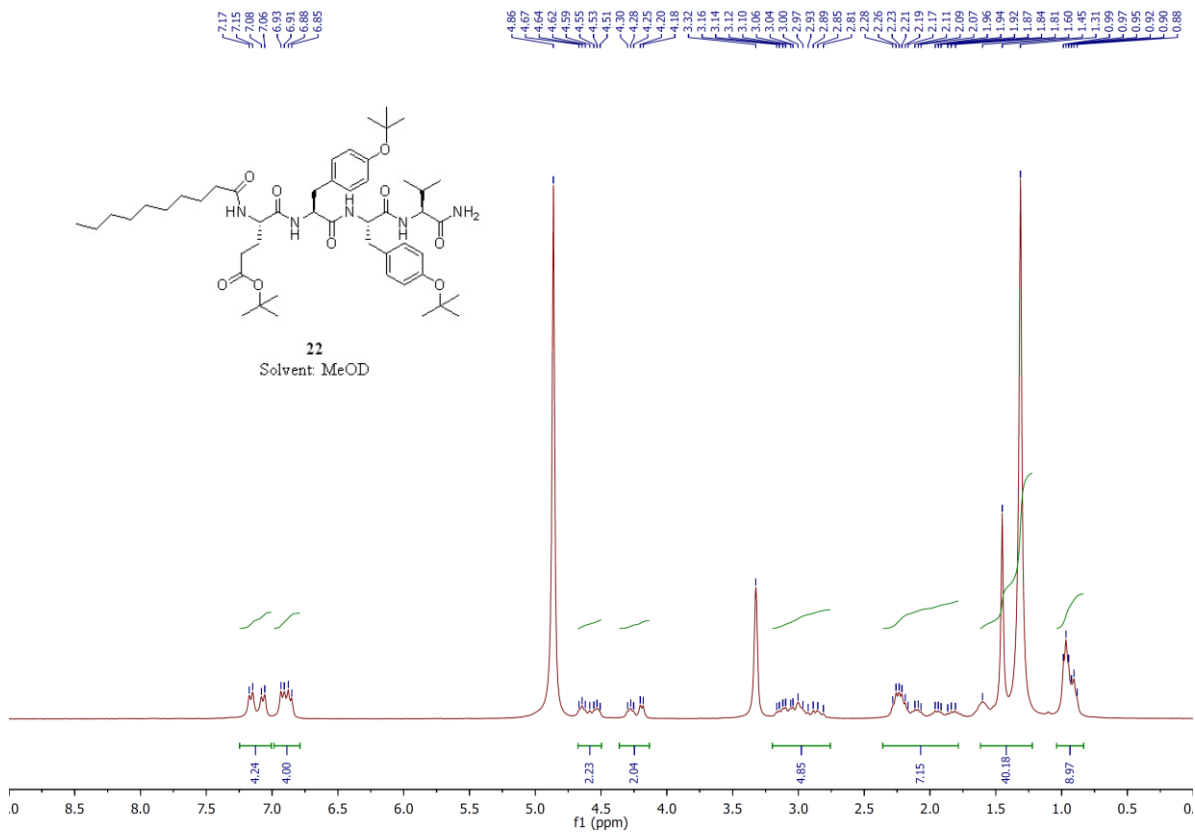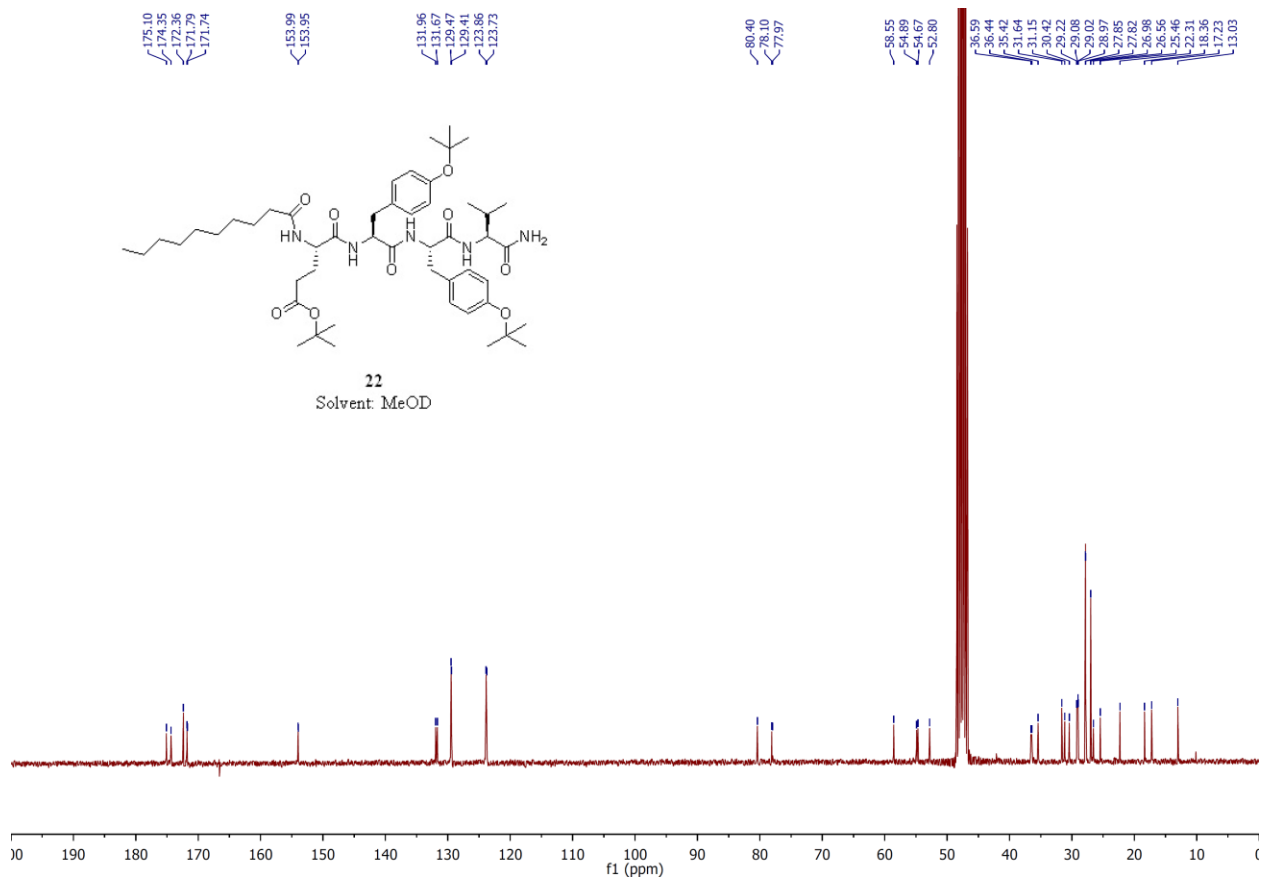

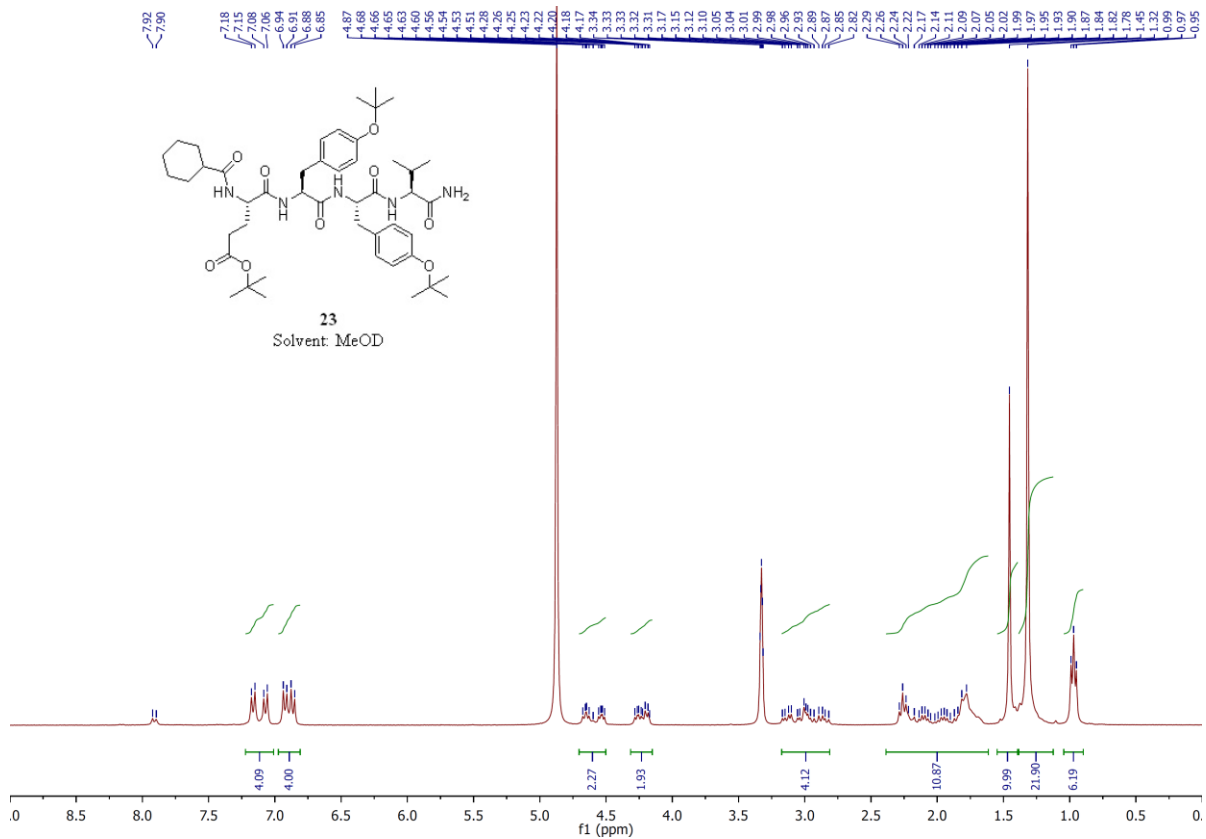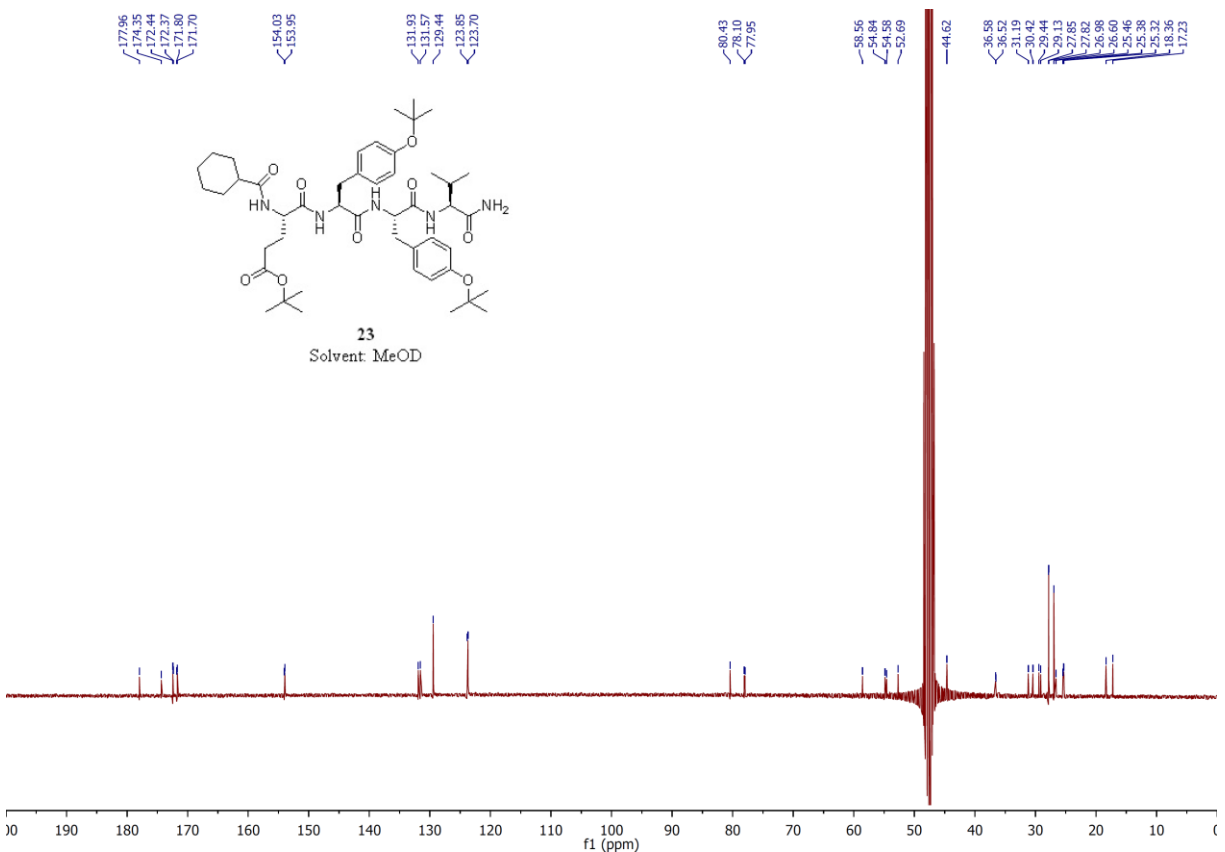

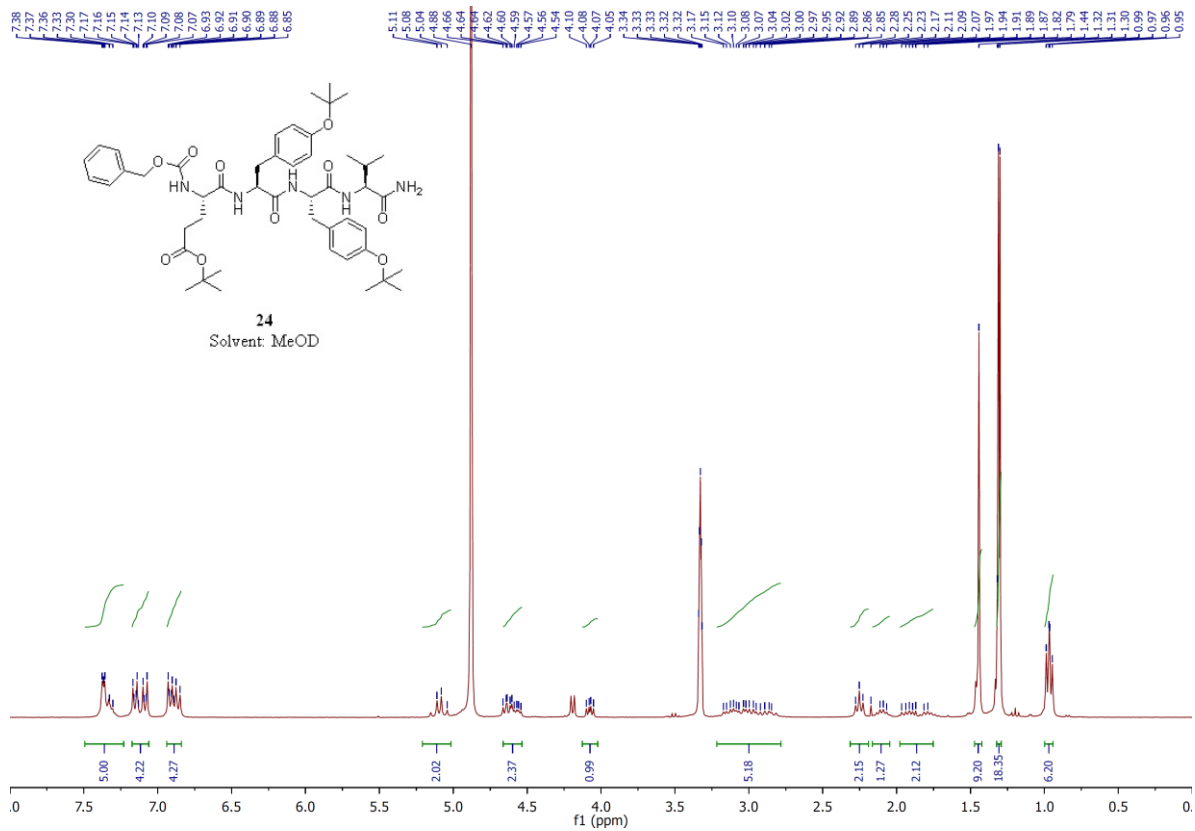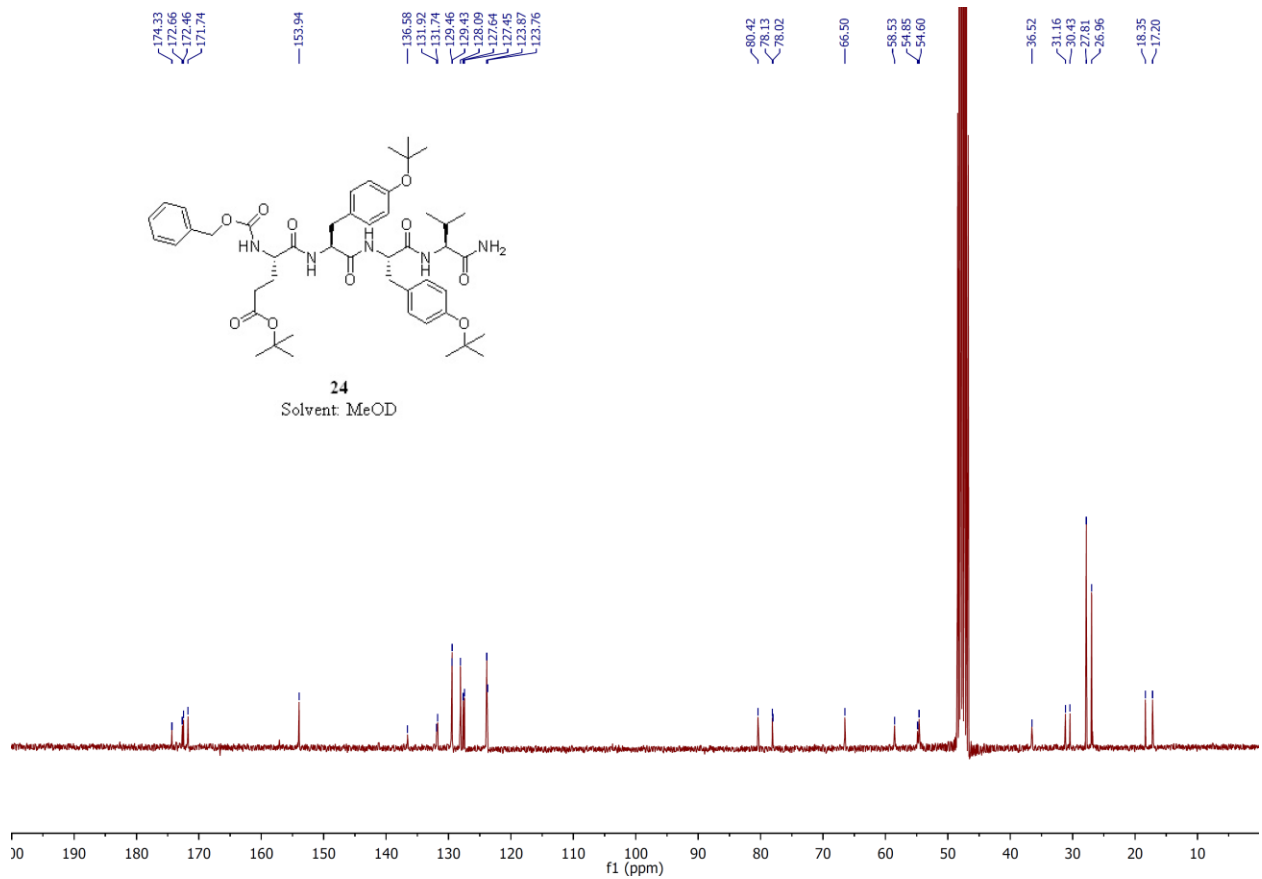

Supplement: molecules-25-03365-s001.pdf [file molecules-25-03365-s001.pdf]
